# Supplementary material for: Assessing the role of residue Phe108 of cytochrome P450 3A4 in allosteric effects of midazolam metabolism
Source: Royal Society of Chemistry journal article supplement (doi:10.1039/d3cp05270b), 2024-01-01
Supplement: d3cp05270b1.pdf [file d3cp05270b1.pdf]

Supplementary Information for

**Assessing the Role of Residue Phe108 of Cytochrome P450 3A4 in  
Allosteric Effects of Midazolam Metabolism**

Tingting Fu,<sup>ab</sup> Hongxing Zhang<sup>b</sup> and Qingchuan Zheng<sup>\*ab</sup>

<sup>a</sup> School of Pharmaceutical Sciences, Jilin University, Changchun, 130021, China.

<sup>b</sup> Institute of Theoretical Chemistry, College of Chemistry, Jilin University, Changchun, 130023, China.

**\*Corresponding author**

E-mail addresses: zhengqc@jlu.edu.cn (Qingchuan Zheng).

## List of contents:

**Fig. S1.** The structures of MDZ, 1'-OH-MDZ, 4-OH-MDZ, TST, PGS and ANF.

**Fig. S2.** The globular domain (S29-A503) of CYP3A4. The active site and the two peripheral allosteric sites (Site 1 and Site 2) are highlighted with orange, yellow, and cyan dots. The F-F' loop, G-G' loop, and B-C loop are shown in cyan, orange, and pink, respectively. The heme and residue F108 are shown in sticks.

**Fig. S3.** Complex models and residue structures. The complex models constructed in this study: (A) the CYP3A4-MDZ-MDZ complex; (B) the CYP3A4-MDZ-TST complex. (C) Structures of F108 and mutant residues A108, M108, and W108. The S-MDZ, E-MDZ, and TST are shown in orange, yellow, and cyan, respectively.

**Table S1.** The length of 2a and 2f channels in the wild-type and mutation systems (Å).

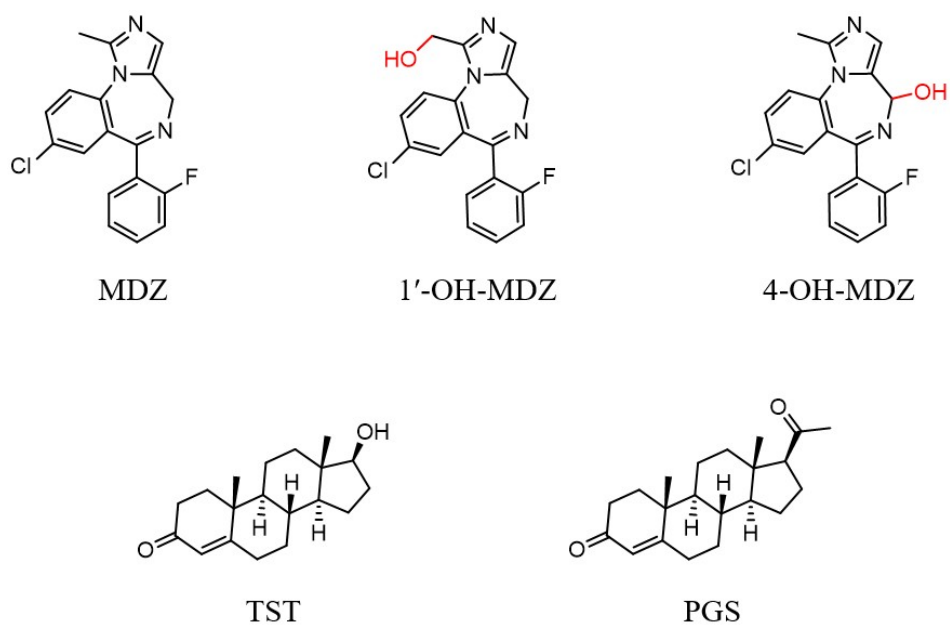

**Fig. S1.** The structures of MDZ, 1'-OH-MDZ, 4-OH-MDZ, TST, and PGS.

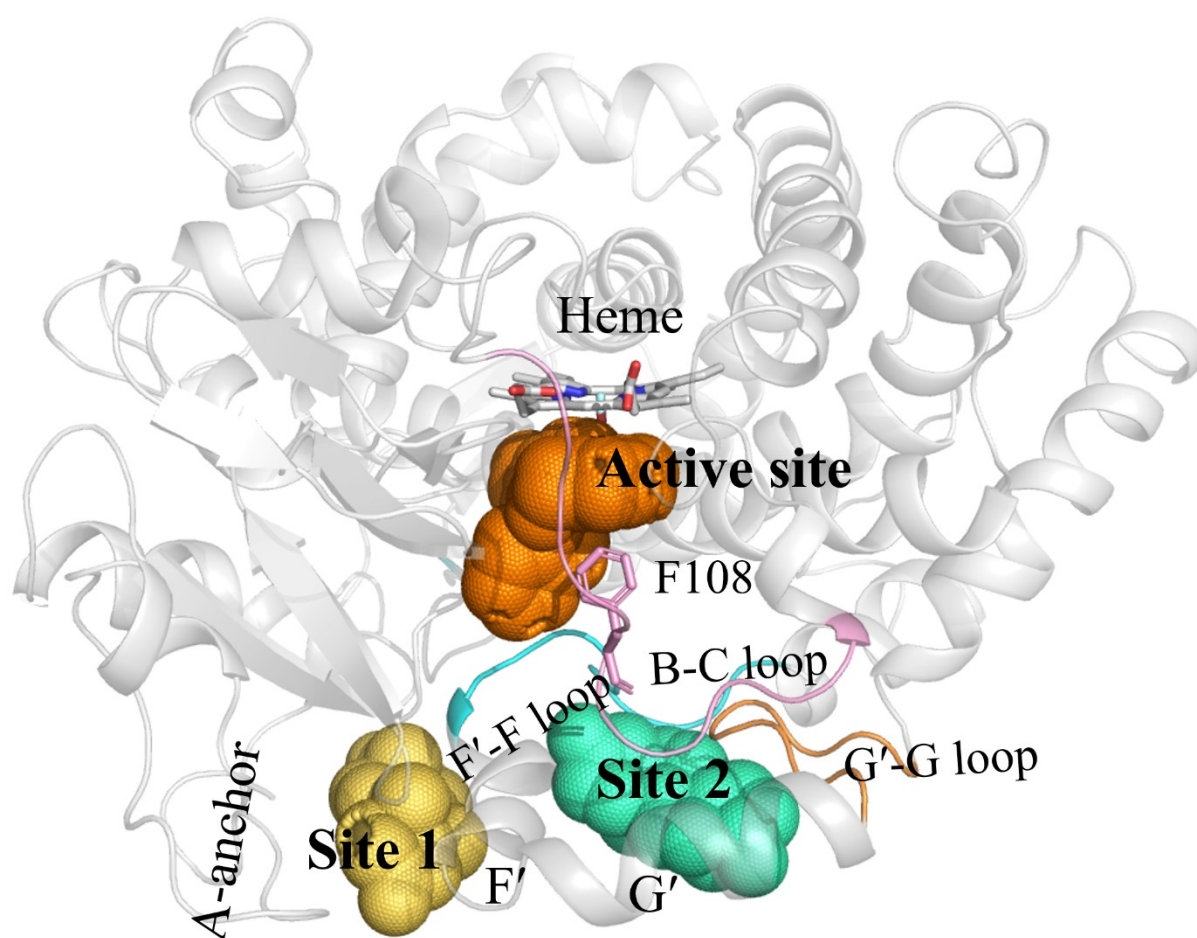

**Fig. S2.** The globular domain (S29-A503) of CYP3A4. The active site and the two peripheral allosteric sites (Site 1 and Site 2) are highlighted with orange, yellow, and cyan dots. The F-F' loop, G-G' loop, and B-C loop are shown in cyan, orange, and pink, respectively. The heme and residue F108 are shown in sticks.

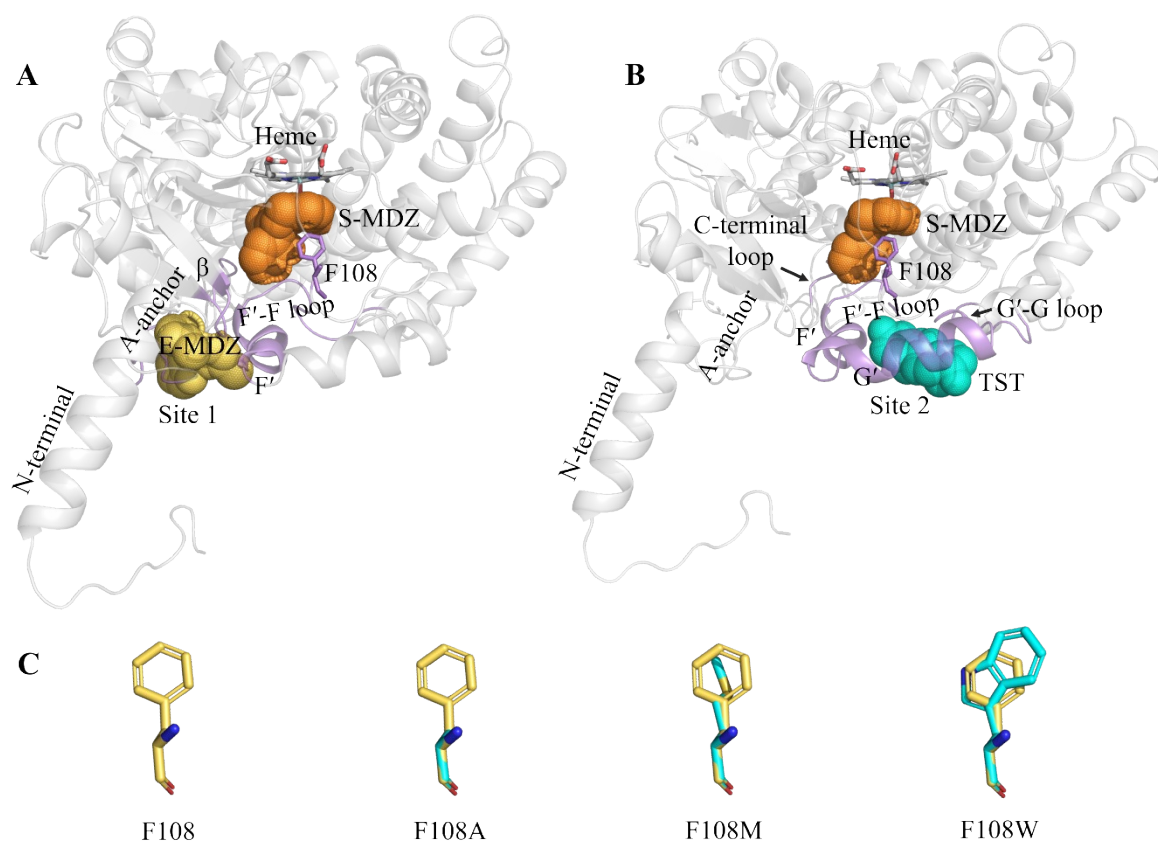

**Fig. S3.** Complex models and residue structures. The complex models constructed in this study: (A) the CYP3A4-MDZ-MDZ complex; (B) the CYP3A4-MDZ-TST complex. (C) Structures of F108 and mutant residues A108, M108, and W108. The S-MDZ, E-MDZ, and TST are shown in orange, yellow, and cyan, respectively.

**Table S1.** The length of 2a and 2f channels in the wild-type and mutation systems (Å).

| Systems        | 2a    | 2f    |
|----------------|-------|-------|
| CYP3A4-MDZ-TST | 31.19 | 32.25 |
| F108A-MDZ-TST  | 19.63 |       |
| F108M-MDZ-TST  | 28.47 | 23.24 |
| F108W-MDZ-TST  | 16.31 | 27.16 |
